# Supplementary material
Source: HighWire-hosted journal article supplement (https://cmaj.ca/highwire/filestream/73757/field_highwire_adjunct_files/1/190550-com-2-at.pdf)
Supplement: 190550-com-2-at.pdf [file 190550-com-2-at.pdf]

**Appendix 2 (as supplied by the authors): Reforms to statutory regulation LDTs across four jurisdictions**

|                                                                  | US                                                                                                                                         | EU                                                                                                                             | Australia                                                                                                                                                                        | Canada |
|------------------------------------------------------------------|--------------------------------------------------------------------------------------------------------------------------------------------|--------------------------------------------------------------------------------------------------------------------------------|----------------------------------------------------------------------------------------------------------------------------------------------------------------------------------|--------|
| Effort to create statutory regulation for market access for LDTs | The US FDA has attempted to assert regulatory authority over this field since 1992. A current congressional bill attempts some regulation. | The EU recently introduced a new regulation for in vitro diagnostics in 2017, covering many LDTs. To take full effect by 2022. | Australia's Therapeutic Goods Administration (TGA) began developing a system to track and regulate these technologies in the 2000s, relying heavily on laboratory accreditation. | None   |
| Effort to track LDTs                                             | The FDA has written warning letters but there is no comprehensive effort to track tests and publicly identify them.                        | Currently unclear whether the EU will publish a registry of the LDT tests covered by the new regulation.                       | Track all LDTs in a non-public registry and track high-risk LDTs in a public registry.                                                                                           | None   |
